# Supplementary material
Source: publisher site journal article supplement (https://www.dovepress.com/article/441500)
Supplement: Supplementary file 1 [file get_supplementary_file.php]

**Supplemental table 1.** Correlations between baseline and final demographic, clinical, tomographic, and functional visual fields’ parameters.

| Parameter | Baseline age (years) | Baseline RNFL (μm) | Baseline IOP (mmHg) | Baseline BCVA (logMAR units) | Baseline MD (dB) | CCT (μm) | Final RNFL (μm) | Final IOP (mmHg) | Final BCVA (logMAR units) | Final MD (dB) |
| --- | --- | --- | --- | --- | --- | --- | --- | --- | --- | --- |
| Baseline age (years) |  | 0.166  p=0.177  *n*=68 | 0.136  p=0.267  *n*=68 | -0.035  p=0.776  *n*=68 | 0.125  p=0.429  *n*=42 | -0.296  p=0.099  *n*=32 | 0.180  p=0.142  *n*=68 | -0.129  p=0.296  *n*=68 | 0.133  p=0.279  *n*=68 | -0.029  p=0.851  *n*=45 |
| Baseline RNFL (μm) | 0.166  p=0.177  *n*=68 |  | 0.067  p=0.585  *n*=68 | **-0.241**  **p=0.048**  *n*=68 | **0.651**  **p<0.001**  *n*=42 | 0.244  p=0.179  *n*=32 | **0.969**  **p<0.001**  *n*=68 | 0.163  p=0.184  *n*=68 | -0.099  p=0.422  *n*=68 | **0.741**  **p<0.001**  *n*=45 |
| Baseline IOP (mmHg) | 0.136  p=0.267  *n*=68 | 0.067  p=0.585  *n*=68 |  | -0.110  p=0.370  *n*=68 | **-0.321**  **p=0.038**  *n*=42 | **0.546**  **p<0.001**  *n*=32 | 0.073  p=0.553  *n*=68 | 0.124  p=0.314  *n*=68 | -0.156  p=0.205  *n*=68 | 0.266  p=0.077  *n*=45 |
| Baseline BCVA (logMAR units) | -0.035  p=0.776  *n*=68 | **-0.241**  **p=0.048**  *n*=68 | -0.110  p=0.370  *n*=68 |  | -0.295  p=0.058  *n*=42 | -0.117  p=0.524  *n*=32 | -0.212  p=0.082  *n*=68 | -0.023  p=0.851  *n*=68 | **0.653**  **p<0.001**  *n*=68 | -0.278  p=0.065  *n*=45 |
| Baseline MD (dB) | 0.125  p=0.429  *n*=42 | **0.651**  **p<0.001**  *n*=42 | **-0.321**  **p=0.038**  *n*=42 | -0.295  p=0.058  *n*=42 |  | 0.230  p=0.315  *n*=32 | **0.685**  **p<0.001**  *n*=42 | 0.123  p=0.438  *n*=42 | -0.113  p=0.477  *n*=42 | **0.883**  **p<0.001**  *n*=42 |
| CCT (μm) | -0.296  p=0.099  *n*=32 | 0.244  p=0.179  *n*=32 | **0.546**  **p<0.001**  *n*=32 | -0.117  p=0.524  *n*=32 | 0.230  p=0.315  *n*=32 |  | 0.210  p=0.249  *n*=32 | **0.390**  **p=0.027**  *n*=32 | -0.145  p=0.428  *n*=32 | **0.416**  **p=0.043**  *n*=32 |
| Final RNFL (μm) | 0.180  p=0.142  *n*=68 | **0.969**  **p<0.001**  *n*=68 | 0.073  p=0.553  *n*=68 | -0.212  p=0.082  *n*=68 | **0.685**  **p<0.001**  *n*=42 | 0.210  p=0.249  *n*=32 |  | 0.193  p=0.115  *n*=68 | -0.047  p=0.706  *n*=68 | **0.759**  **p<0.001**  *n*=45 |
| Final IOP (mmHg) | -0.129  p=0.296  *n*=68 | 0.163  p=0.184  *n*=68 | 0.124  p=0.314  *n*=68 | -0.023  p=0.851  *n*=68 | 0.123  p=0.438  *n*=42 | **0.390**  **p=0.027**  *n*=32 | 0.193  p=0.115  *n*=68 |  | 0.041  p=0.750  *n*=68 | 0.139  p=0.362  *n*=45 |
| Final BCVA (logMAR units) | 0.133  p=0.279  *n*=68 | -0.099  p=0.422  *n*=68 | -0.156  p=0.205  *n*=68 | **0.653**  **p<0.001**  *n*=68 | -0.113  p=0.477  *n*=42 | -0.145  p=0.428  *n*=32 | -0.047  p=0.706  *n*=68 | 0.041  p=0.750  *n*=68 |  | -0.157  p=0.304  *n*=45 |
| Final MD (dB) | -0.029  p=0.851  *n*=45 | **0.741**  **p<0.001**  *n*=45 | 0.266  p=0.077  *n*=45 | -0.278  p=0.065  *n*=45 | **0.883**  **p<0.001**  *n*=42 | **0.416**  **p=0.043**  *n*=32 | **0.759**  **p<0.001**  *n*=45 | 0.139  p=0.362  *n*=45 | -0.157  p=0.304  *n*=45 |  |
|  |  |  |  |  |  |  |  |  |  |  |

BCVA, best-corrected visual acuity; CCT, central corneal thickness; IOP, intraocular pressure; logMAR, logarithmic minimum angle of resolution; MD, mean deviation; RNFL, retinal nerve fiber layer. Table values are Pearson/Spearman correlations, their significance values, and the number of eyes included in the correlation (*n*).

Significant *p* values are highlighted in bold. *n* denotes the number of eyes evaluated.
